# Supplementary material
Source: publisher site journal article supplement (https://www.dovepress.com/article/384450)
Supplement: Supplementary file 1 [file get_supplementary_file.php]

Appendix 1. Example of the Search terms

| **Source and search date** | **Search string** | **Notes** |
| --- | --- | --- |
| PubMed  Result:  88  Search date:  10-11-2021 | ("randomized controlled trial"[pt] OR "controlled clinical trial"[pt] OR "randomallocation"[mesh])  AND (“obesity” [MeSHTerms] OR "obesity"[Title/Abstract] OR "obese"[Title/Abstract] OR "overweight"[MeSH Terms] OR "overweight"[Title/Abstract] OR "over weight"[Title/Abstract] OR "body mass index"[Title/Abstract] OR “BMI”[Title/Abstract] OR “weight gain"[MeSHTerms])  AND ("workplace"[MeSH Terms] OR "workplace"[Title/Abstract] OR "occupational groups"[MeSH Terms] OR "occupationalgroups"[Title/Abstract] OR "occupational"[Title/Abstract] OR "groups"[Title/Abstract] OR "worksite"[Title/Abstract] OR "working"[Title/Abstract] OR "employee"[Title/Abstract]OR "work-based"[Title/Abstract] OR "workplace"[MeSH Terms] OR "workplace"[Title/Abstract] OR"worker*"[Title/Abstract])  AND ("apps"[Title/Abstract] OR "mobile healthintervention"[Title/Abstract] OR "mobile-based"[Title/Abstract] OR "mobileapplication"[Title/Abstract] OR "mhealth"[Title/Abstract] OR "mobile*"[Title/Abstract]OR "internet"[MeSH Terms] OR "internet-based"[Title/Abstract] OR "telephone"[MeSHTerms] OR "videoconferencing"[MeSH Terms] OR "e-health"[Title/Abstract] OR"teleconsultations"[Title/Abstract] OR "remote consultation"[MeSH Terms] OR"telecare"[Title/Abstract] OR "telemonitoring"[Title/Abstract] OR"telehealth"[Title/Abstract] OR "telemedicine"[MeSH Terms]OR“mobile healthapplication"[Title/Abstract] OR“remote consultation"[Title/Abstract] OR“webbrouser"[Title/Abstract] OR“smartphone"[Title/Abstract] OR“cell phone"[Title/Abstract]) | All search terms are searched in the search fields: “title” and “abstract” and in MeSH (when available).  No filters or limitations applied. |
